# Supplementary material
Source: PubMed Central journal article supplement (PMC1446091)

### supplemental figure 1

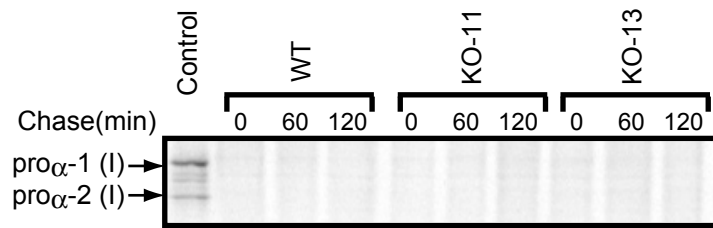

### supplemental figure 2

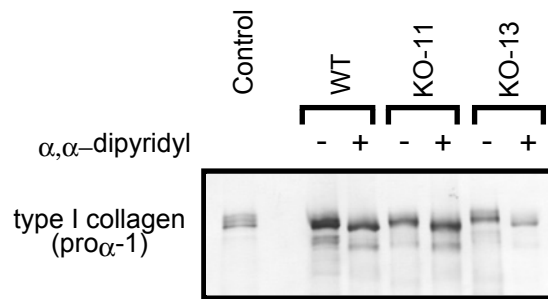

### supplemental figure 3

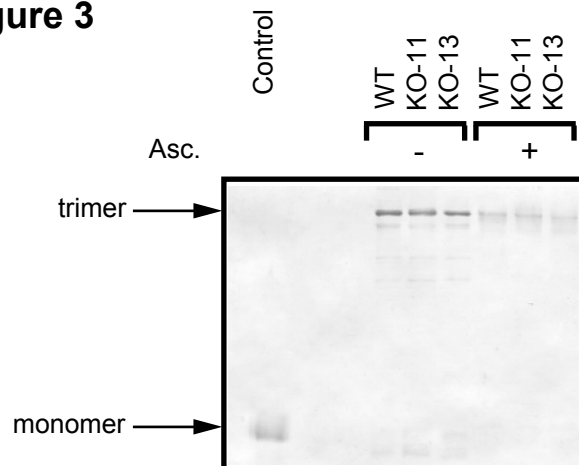

Supplement: mbc_E05-11-1065_1.pdf [file mbc_E05-11-1065_1.pdf]
